# Supplementary material
Source: PubMed Central journal article supplement (PMC6318701)
Supplement: mmc1.pdf [file mmc1.pdf]

**YMTHE, Volume 27**

**Supplemental Information**

**Gesicle-Mediated Delivery of CRISPR/Cas9  
Ribonucleoprotein Complex for Inactivating  
the HIV Provirus**

**Lee A. Campbell, Lamarque M. Coke, Christopher T. Richie, Lowella V. Fortunato, Aaron Y. Park, and Brandon K. Harvey**

Supplemental Figures

**A**

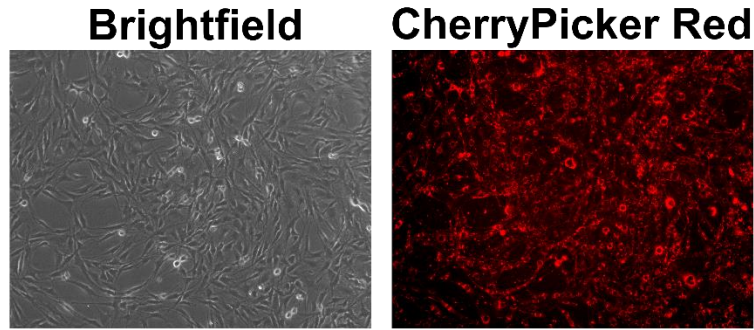

**B**

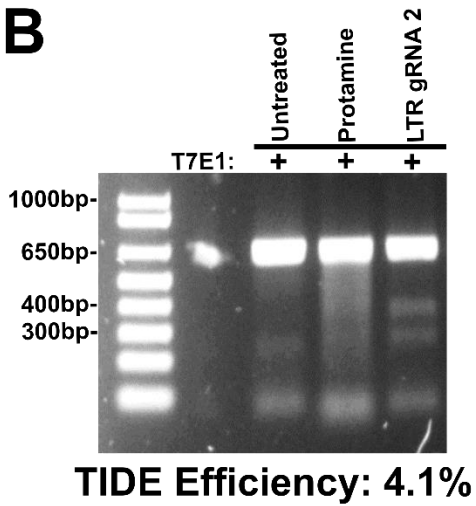

**C**

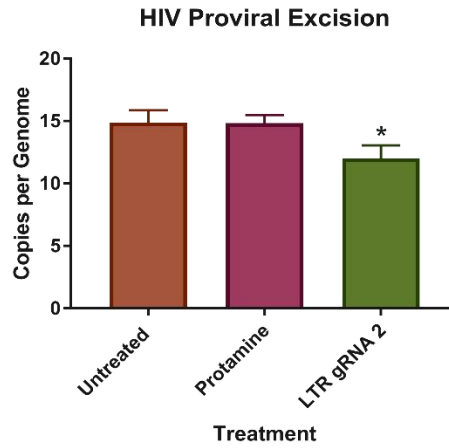

**D**

**Off-target TIDE Analysis**  
after LTR gRNA 2 treatment: **1.7% Efficiency**

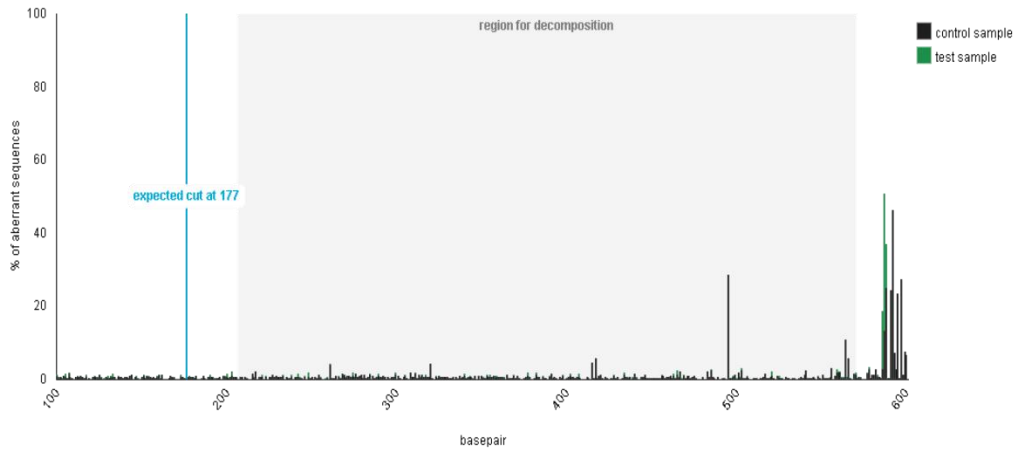

**Figure S1. Molecular characterization of LTR gRNA 2.** HIV-NanoLuc CHME-5 microglia were treated with vesicles containing LTR gRNA 2. **(A)** Live cell images of vesicle treatment showed CherryPicker Red expression. **(B)** T7E1 assay showed positive products for mutation by LTR gRNA 2, with a TIDE efficiency of 4.1%. **(C)** A significant loss of proviral copy number is observed by DDPCR. **(D)** Examination of the top off-target of LTR gRNA 2 resulted in a 1.7% mutation efficiency. Data are the mean  $\pm$  SEM of three experiments, \* $p < 0.05$  vs untreated cells.

**A****NanoLuciferase Expression after Cas9 +/- LTR gRNA Transfection**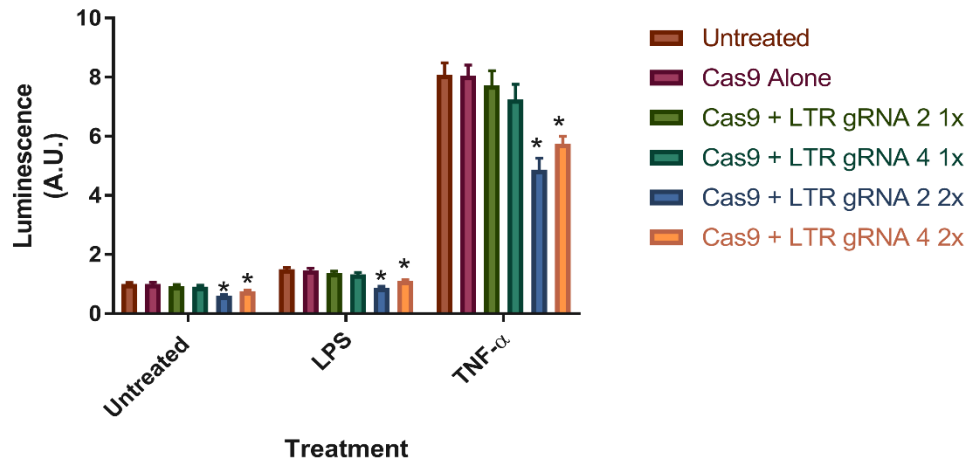**B****Copy Number after Cas9 +/- LTR gRNA Transfection**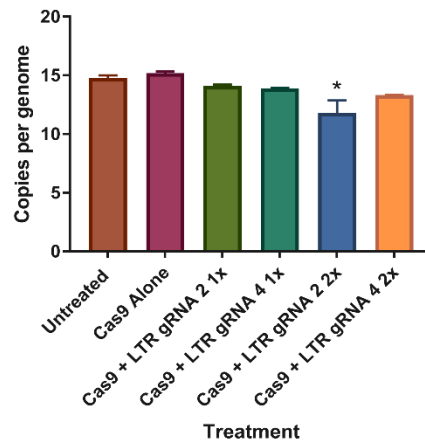**C****Off-target TIDE Analysis after LTR gRNA 4 treatment: 2% Efficiency**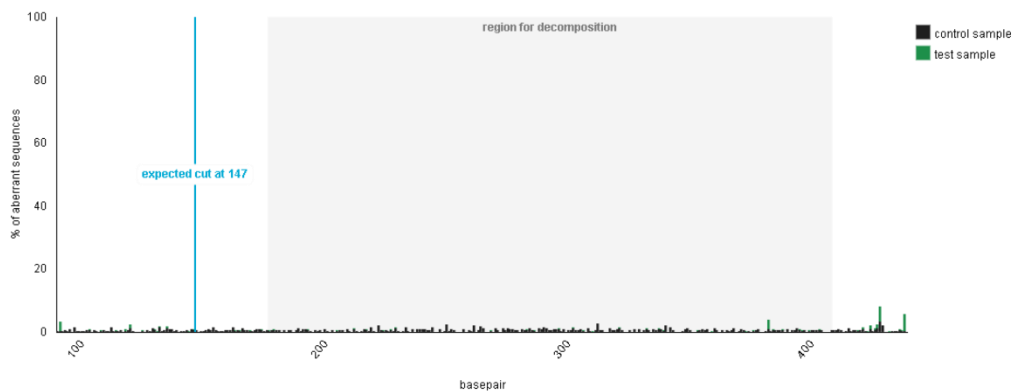

**Figure S2. Plasmid transfection of HIV LTR gRNA 2 and 4.** HIV-NanoLuc CHME-5 cells were transfected with separate plasmids containing Cas9 and the specified LTR gRNA. Significant changes from the control were only observed after 2 rounds of transfection. **(A)** Cells transfected 1x or 2x were assayed for HIV proviral activity by NanoLuciferase. LTR gRNA 2 and 4 showed significant reduction in activity after 2 rounds of transfection only. Raw luminescence values are shown. **(B)** Proviral copy number loss was assayed using ddPCR, with significant reduction observed with LTR gRNA 2 after 2 rounds of transfections. **(C)** Off-target analysis by TIDE showed a 2% efficiency using LTR gRNA 4 2x. Data are the mean  $\pm$  SEM of two stable cultures, with three experiments each \*p<0.05 vs untreated cells within each stimulation group.

## Supplemental Materials and Methods (also found in main document)

**NanoSight analysis:** Analysis of size and concentration was performed on different vesicle preparations using the NanoSight NS500 (NanoSight/Malvern, Salisbury, UK). Light scatter mode was used to detect all particles in the solution. Vesicle preparations were diluted at a 200 µg/ml concentration and infused into the instrument. Six screen captures of 30 seconds each were used for particle analysis. Fluorescent mode using a 565 nm laser was utilized to detect CherryPicker Red positive particles only. Camera level was used at 16 (NTA 3.0 levels) and detection threshold was set at 3. [For Supplemental Video 1.](#)

**EVOS Live Cell Imaging:** For live cell time-course imaging of vesicle application, HIV-NanoLuc CHME-5 microglia were plated on a 24 well plate 0.5x10<sup>5</sup> cell/well in 1 ml of media the day before experimentation. The day of experimentation, media was changed to 600 µl of Fluorobrite Imaging Media (Gibco) supplemented with 5% FBS (Hyclone), 1% penicillin/streptomycin (Gibco), and 8 µg/ml protamine sulfate. Vesicles were applied by centrifugation as described, and the plate was placed in an EVOS FL Auto2 incubator/microscope (EVOS/Thermo-Fisher). Brightfield and red fluorescent images were taken every 15 minutes for 16 hours. [For Supplemental Video 2.](#)

**Determining off-target mutation by CRISPR/Cas9:** Potential off target regions utilizing HIV LTR gRNAs were determined using [crispor.tefor.net](http://crispor.tefor.net). The HIV LTR gRNA sequences were scanned against the rat genome due to CHME-5 cells originating from the rat. The top two predicted off-target sites for LTR gRNA 2 and 4 were chosen and primers were developed to amplify this region to be used for the resolvase assay. LTR gRNA 2 off-target 1 is located on chromosome #1 and off-target 2 is located on chromosome #17. LTR gRNA 4 off-target 1 is located on chromosome #14 and off target 2 is located on chromosome #17. After comparing the off-target sites with the gRNA sequence we confirmed that no gRNA sequence had 100% homology to the paired off-target. Furthermore, no off-target areas are located within exon regions. Primers used for analysis are as follows. LTR gRNA 4 Off-target 1: Fwd: 5'-GCGTGAGGGCTTTGTAGAGCTG-3', Rev: 5'-GCTAGCAAACATCACCACAG-3', TIDE primer 5'-GACTTTCATCAGCCAGGGCAC-3'; LTR gRNA 4 Off-target 2: Fwd: 5'-GACCAAGCCATCTTCTGACAC-3', Rev: 5'-GTTTGGGTTGCAGCCTTTCTCC-3', TIDE primer 5'-GGGTTGGTGTGGTTGGTAGAG-3'; LTR gRNA 2 Off-target 1: Fwd: 5'-GGAGCAACTGGTGTGATTCTG-3', Rev: 5'-GGTCCATTCTGCGAAGATGAG-3', TIDE primer 5'-CATAGGGACAGGCATTATGG-3'; LTR gRNA 2 Off-target 2: Fwd: 5'-GGCTTCAGAAGCCTCAGAATG-3', Rev: 5'-GCTCTCCTTCCTGCCAGTGTAG-3', TIDE primer 5'-GCTTTCACCTTCCCAGTGCC-3'. [For Supplemental Figure 1, Supplemental Figure 2.](#)

**PCR:** The genomic DNA was isolated using the NucleoSpin® Tissue Column (Macherey-Nagel Bethlehem, PA) according to the manufacturer's instructions. DNA concentrations were approximated by A260 reading, using a Nanodrop 2000 (Thermo-Fisher). PCR reactions were prepared using Phusion High Fidelity GC Buffer (New England Biolabs, Ipswich, Ma) with 5 µM forward and reverse primers and 1 µl of DNA sample. PCR was carried out in a Bio-Rad C1000™ Thermal Cycler (Bio-Rad, Hercules, CA) using the following cycle. For amplification of HIV-LTR: 98°C for 30 sec., 40x cycle of 98°C → 72°C, 72°C 5min, 12°C hold. PCR products were run on a 1% agarose gel made with 1xTAE (VWR, Radnor, PA) with SYBR Safe DNA gel stain (Thermo-Fisher) for 45 min. LTR amplification primers used were Fwd: 5'-CTCTGCTGCCTCCTGTCTTCTG-3', Rev: 5'-GTTTCAGAATCTCGGGGTGTCG-3', TIDE primer 5'-CCTTCTAGCCTCCGCTAGTC-3'. [For Supplemental Figure 1.](#)

**T7 Endonuclease 1:** The T7 Endonuclease 1 enzyme- "T7E1" (New England Biolabs) was used to detect mutations in the HIV-LTR PCR amplified region. Amplified products were denatured and slowly annealed in NEBuffer 2 (New England Biolabs) using the following cycle: 95°C 5 min., 85°C 30 sec. → ramp 2°C per 5 sec., 25°C 30 sec. → ramp 0.1°C per sec., 25°C hold. T7E1 was then added to the reannealed products and incubated at 37°C for 1 hour. DNA was run on a 1% agarose gel and presence of T7E1 digestion was used to verify CRISPR/Cas9 mediated mutation. [For Supplemental Figure 1.](#)

**Droplet Digital PCR:** The relative copy number per genome of the modified HIV provirus was determined using Droplet Digital PCR (Bio-Rad-QX200) to quantify the number of provirus templates per microliter for the *NanoLuc* transgene relative to the autosomal reference gene *GGT1*. Primers and probes used are as follows: *NanoLuc* DDPCR- Fwd: 5'-ATTGTCCTGAGCGGTGAAA-3', Rev: 5'-CACAGGGTACACCACCTTAAA-3', Probe:

FAM-TGGGCTGAAGATCGACATCCATGT-Iowa Black; *GGTI* DDPCR- Fwd: 5'-CCACCCCTTCCCTACTCCTAC-3', Rev: 5'-GGCCACAGAGCTGGTTGTC-3', Probe: HEX-CCGAGAAGCAGCCACAGCCATACCT-Iowa Black. *Nef* EVAGreen assay: *Nef* Fwd 5'-GGCTGGATGGCCTACTGTAAGG-3', *Nef* Rev 5'-GTCTTTCCAGGTCTCGAGATACTGC-3'. Reaction conditions consisted of a master mix containing: 1x ddPCR<sup>TM</sup> Supermix for Probes no dUTP (Bio-Rad), 450 nM forward and reverse primers, 50 nM probe, 0.1U MseI restriction enzyme with 50 ng genomic DNA. Reactions were run analyzing *NanoLuc* and *GGTI* simultaneously as a duplex reaction. Reactions for *Nef* were performed using EVAGreen Dye (BioRad). Equation for calculating copy number is  $((\text{copies}/\mu\text{L } NanoLuc)/(\text{copies}/\mu\text{L } GGTI))^2 = \text{copy number provirus per genome}$ . [For Supplemental Figure 1, Supplemental Figure 2.](#)

**Transient transfection of CRISPR/Cas9:** HIV-NanoLuc CHME-5 cells were plated on a 24 well plate at  $0.5 \times 10^5$  cells per well in 1 ml of media. The plasmids utilized were FLAG-tagged NLS-Cas9-T2A-PuroR, (Addgene #48139) and the LTR gRNAs were ligated into the pGuide-it-sgRNA vector (previously described). Lipofectamine 2000 (Thermo-Fisher) was used as the transfection reagent and the concentration for each treatment are as follows: Cas9: 1.6  $\mu\text{g}/\text{ml}$  + pBluescript II SK1.6 (Addgene #212205), Cas9: 1.6  $\mu\text{g}/\text{ml}$  + LTR gRNA 2: 1.6  $\mu\text{g}/\text{ml}$ , Cas9: 1.6  $\mu\text{g}/\text{ml}$  + LTR gRNA 4: 1.6  $\mu\text{g}/\text{ml}$ . Cells were treated with either one round of transfection or two rounds of transfection after the first cellular expansion and plating procedure. [For Supplemental Figure 2.](#)

**Luciferase assay:** NanoLuciferase was assay as previously described. Cells that were prepared for luciferase assay were lysed directly in an opaque 96 well using RIPA lysis buffer/1% NP 40 with protease inhibitor. Luminescence was measured in the opaque plate using the substrate coelenterazine (Regis Technologies Morton Grove, IL, USA) in a Bio-Tek Synergy 2 plate reader (Winooski, VT, USA). [For Supplemental Figure 2.](#)

**Statistical Analysis:** All analyses were evaluated by Prism Graphpad, GraphPad Software (Inc., La Jolla, CA, USA). Data were analyzed with one-way ANOVA with Bonferonni's multiple comparison post-test, or with two-way ANOVA with Tukey's multiple comparison post-test. Data are expressed as the mean  $\pm$  SEM. Statistically significant differences were considered as  $p < 0.05$ .
